# Supplementary material for: Discontinuities in quinoa biodiversity in the dry Andes: An 18-century perspective based on allelic genotyping
Source: PLoS One. 2018 Dec 5;13(12):e0207519. doi: 10.1371/journal.pone.0207519 (PMC6281180; doi:10.1371/journal.pone.0207519)
Supplement: S2 File — (Dataset). S2–File-WINKEL-et-al-Allelic-profiles-Dataset-(2018-04-05). (CSV) [file pone.0207519.s003.csv]

Loci#	Sample#	Population#	Pop01	Pop02	Pop03	Pop04	Pop05	Pop06	Pop07	Pop08	Pop09	Pop10	Pop11	Pop12	Pop13	Pop14	Pop15	Pop16	Pop17	Pop18	Pop19
24	157	19	8	8	2	4	8	6	8	8	6	8	7	8	10	19	10	25	8	2	2
			01: CHEN272	02: CHEN275	03: CHEN414	04: CHEN420	05: CHEN427	06: CHEN446	07: CHEN458	08: CHEN461	09: CHEN466	10: ANT	11: BL	12: EST	13: PPE-d	14: PPE-w	15: AP4	16: AP9-w	17: AP9-d	18: TC2	19: ACS
Sample	Modern/Archaeo	GCA_057	GCA_057	KGA_003	KGA_003	KGA_020	KGA_020	QAAT_001	QAAT_001	QAAT_011	QAAT_011	QAAT_022	QAAT_022	QAAT_024	QAAT_024	QAAT_027	QAAT_027	QAAT_050b	QAAT_050b	QAAT_062	QAAT_062	QAAT_071	QAAT_071	QAAT_074	QAAT_074	QAAT_087	QAAT_087	QAAT_088	QAAT_088	QAAT_097	QAAT_097	QAAT_106	QAAT_106	QAAT_112	QAAT_112	QAAT026	QAAT026	QAAT078	QAAT078	QATG_064	QATG_064	QCA_037	QCA_037	QCA_053	QCA_053	QCA024	QCA024	QGA003	QGA003
CHEN272-01	modern	164	166	154	162	152	167	-1	-1	-1	-1	177	195	200	209	-1	-1	200	236	160	189	163	166	-1	-1	204	204	130	133	176	191	297	309	197	200	181	196	194	194	167	167	189	189	176	176	179	189	143	161
CHEN272-02	modern	164	164	153	153	169	169	-1	-1	-1	-1	174	195	200	200	-1	-1	203	239	175	195	166	173	-1	-1	180	195	130	139	176	182	297	297	185	200	175	196	194	197	167	170	181	189	176	196	195	199	135	153
CHEN272-03	modern	166	166	153	162	169	182	-1	-1	-1	-1	195	195	200	200	153	153	189	203	189	189	140	173	-1	-1	195	195	130	139	188	194	297	297	185	197	178	205	191	194	167	167	189	189	196	198	195	195	135	143
CHEN272-04	modern	164	166	153	162	169	180	-1	-1	-1	-1	180	201	200	200	-1	-1	188	203	189	189	173	182	-1	-1	180	189	124	145	182	191	297	297	185	200	181	181	194	197	167	179	181	194	176	196	185	187	143	151
CHEN272-05	modern	164	166	153	162	152	152	-1	-1	-1	-1	192	195	200	200	-1	-1	192	203	189	189	163	173	-1	-1	198	201	130	142	176	194	297	297	185	197	187	205	188	194	167	167	189	191	196	200	189	195	135	151
CHEN272-06	modern	164	166	162	162	152	173	168	204	183	192	177	195	200	203	147	162	200	203	157	189	169	173	173	200	198	204	130	139	180	194	297	312	206	215	181	196	185	194	167	167	191	191	176	200	189	189	135	135
CHEN272-07	modern	164	164	153	153	165	169	189	204	168	198	174	195	200	203	153	173	198	242	181	189	173	285	170	173	198	198	142	148	176	176	297	306	200	215	181	211	194	221	167	167	189	191	176	176	187	195	135	179
CHEN272-08	modern	164	171	153	153	152	152	204	204	168	168	220	220	200	251	153	153	203	203	186	189	173	173	203	203	204	204	130	142	188	188	297	297	185	185	181	184	191	194	167	167	189	191	198	198	189	191	151	153
CHEN275-01	modern	171	171	151	151	165	165	198	204	198	207	220	229	236	248	163	163	202	202	204	204	151	248	173	200	204	204	163	173	200	209	297	297	188	218	184	196	194	194	179	179	189	191	166	178	191	205	153	153
CHEN275-02	modern	171	171	151	151	165	165	198	198	204	204	216	220	218	218	163	163	201	202	181	181	261	273	173	173	186	192	127	170	212	212	297	297	185	188	184	184	194	194	179	179	191	191	166	166	229	229	159	159
CHEN275-03	modern	171	171	151	151	165	165	198	204	204	207	220	229	233	251	163	163	202	205	204	204	151	261	173	200	186	204	170	173	200	212	297	297	185	218	184	184	194	194	179	179	189	191	166	178	191	229	153	159
CHEN275-04	modern	171	171	151	151	165	165	198	204	204	207	216	225	218	251	163	163	202	205	181	181	151	258	173	200	186	204	170	173	200	212	297	297	185	218	184	184	194	194	179	179	189	191	166	178	191	229	153	159
CHEN275-05	modern	171	171	151	151	160	165	198	204	198	204	161	225	233	251	163	163	201	205	189	204	151	154	170	200	186	192	130	142	167	185	297	309	185	188	184	184	194	194	179	179	175	191	166	166	199	205	153	159
CHEN275-06	modern	169	169	151	151	165	165	198	204	198	201	208	208	218	242	163	163	203	203	189	204	258	258	173	188	211	211	136	170	197	212	300	300	200	200	184	187	194	194	179	179	191	191	166	176	195	229	143	159
CHEN275-07	modern	171	171	151	151	165	165	198	201	204	204	220	225	203	218	163	163	203	203	181	181	137	258	200	200	186	186	130	142	206	212	288	297	185	185	184	184	191	191	179	179	175	191	166	176	195	229	151	159
CHEN275-08	modern	171	171	-1	-1	-1	-1	198	204	201	201	208	208	218	242	168	168	201	203	189	204	-1	-1	188	188	186	211	170	170	197	212	288	300	185	185	184	184	194	194	179	179	-1	-1	166	166	195	229	159	159
CHEN414-03	modern	171	171	151	151	165	165	207	207	204	204	222	222	236	236	177	177	200	200	186	186	147	147	209	209	198	198	163	163	215	215	322	322	185	185	184	184	191	253	173	173	191	191	166	166	191	191	153	153
CHEN414-07	modern	171	171	151	151	165	165	207	207	204	204	222	222	215	215	177	177	200	200	186	186	147	147	209	209	198	198	163	163	-1	-1	322	322	185	185	-1	-1	-1	-1	173	173	191	191	166	166	191	191	153	153
CHEN420-04	modern	178	178	153	153	180	180	183	183	195	195	253	253	233	233	165	165	203	203	178	178	203	203	191	191	201	201	133	133	188	188	297	297	185	185	178	178	182	182	179	179	189	189	194	194	195	195	149	151
CHEN420-05	modern	178	178	153	153	180	180	183	183	195	195	253	253	233	233	165	165	203	203	178	178	203	203	197	197	201	201	133	133	188	188	297	297	185	185	178	178	197	197	179	179	189	189	176	176	195	195	151	151
CHEN420-06	modern	178	178	153	153	180	180	183	183	195	195	253	253	233	233	165	165	203	203	178	178	203	203	191	191	204	204	133	133	188	188	297	297	185	185	178	178	197	197	179	179	189	189	176	176	195	195	149	149
CHEN420-08	modern	178	178	153	153	180	180	183	183	195	195	253	253	233	233	159	159	203	203	178	178	200	200	200	200	201	201	133	133	188	188	297	297	185	200	-1	-1	197	197	179	179	189	189	176	176	195	195	151	151
CHEN427-01	modern	155	166	139	139	178	178	198	198	174	174	195	195	218	218	175	175	209	209	169	169	157	160	185	191	165	165	148	148	188	188	318	318	-1	-1	-1	-1	194	197	167	167	191	191	198	198	179	179	177	177
CHEN427-02	modern	155	155	139	139	152	152	195	195	216	216	161	195	218	218	165	165	209	209	172	172	160	160	170	170	189	189	148	148	188	188	318	318	185	185	190	190	194	194	179	179	191	191	176	176	179	179	177	177
CHEN427-03	modern	166	166	139	139	178	178	186	186	216	216	161	161	239	239	163	163	209	209	169	169	273	273	191	191	207	207	148	148	188	188	297	297	185	197	178	178	194	194	179	179	181	181	176	176	185	185	151	193
CHEN427-04	modern	166	171	139	139	163	178	195	195	171	204	161	161	200	221	165	180	200	200	175	175	160	160	185	191	165	165	148	148	182	182	318	318	185	185	178	187	185	185	179	179	191	191	194	194	193	193	177	177
CHEN427-05	modern	155	155	153	153	178	178	189	189	207	207	216	216	200	218	180	180	209	209	169	169	173	173	194	194	165	165	148	148	180	182	318	318	200	200	190	193	191	191	179	179	181	191	198	198	179	187	151	151
CHEN427-06	modern	155	172	139	153	152	178	186	195	207	216	171	195	218	221	180	186	207	209	169	172	157	173	185	185	171	189	142	148	182	188	306	318	185	185	265	265	194	200	173	179	191	191	176	176	179	193	177	177
CHEN427-07	modern	-1	-1	151	153	152	178	195	195	207	216	171	216	218	221	163	180	207	209	-1	-1	173	173	185	194	165	189	148	160	180	188	318	318	185	185	-1	-1	185	194	179	179	185	191	-1	-1	179	193	177	177
CHEN427-08	modern	166	166	141	141	182	182	183	183	204	204	216	216	239	239	163	163	200	200	181	181	273	273	194	194	207	207	148	148	173	173	309	309	185	185	190	190	191	191	179	179	191	191	176	176	193	193	193	193
CHEN446-01	modern	164	164	162	162	169	169	207	207	201	204	152	152	200	200	150	150	198	198	157	157	276	276	200	200	204	204	136	136	191	191	312	312	218	218	190	205	203	203	167	167	189	189	176	176	185	185	151	151
CHEN446-02	modern	164	164	162	162	169	169	213	213	195	195	177	177	200	200	150	150	198	198	157	157	282	282	200	200	204	204	136	136	191	191	312	312	218	218	-1	-1	-1	-1	167	167	189	189	176	176	-1	-1	151	151
CHEN446-03	modern	164	164	162	162	169	169	213	213	195	195	177	177	200	200	150	150	198	198	157	157	279	279	200	200	204	204	136	136	191	191	312	312	218	218	-1	-1	-1	-1	167	167	189	189	176	176	-1	-1	-1	-1
CHEN446-04	modern	164	164	162	162	169	169	207	207	201	201	152	152	200	200	147	147	198	198	157	157	273	273	200	200	204	204	136	136	191	191	312	312	218	218	190	190	203	203	167	167	189	189	176	176	185	185	151	151
CHEN446-05	modern	164	164	162	162	169	169	213	213	195	195	177	177	200	200	150	150	198	198	157	157	282	282	200	200	204	204	136	136	191	191	312	312	218	218	-1	-1	188	188	167	167	189	189	176	176	189	189	151	151
CHEN446-08	modern	164	164	162	162	169	169	207	213	195	201	152	177	200	200	150	150	198	198	157	157	276	282	200	200	204	204	136	136	191	191	312	312	218	218	190	190	188	203	167	167	189	189	176	176	185	189	151	151
CHEN458-01	modern	171	171	153	153	175	175	192	192	204	204	168	168	215	215	168	168	209	209	207	207	163	163	197	197	204	204	130	130	173	173	300	300	197	197	193	193	191	191	173	173	191	191	184	184	179	179	151	151
CHEN458-02	modern	171	171	153	153	175	175	192	192	204	204	168	168	215	215	168	168	209	209	207	207	163	163	197	197	204	204	130	130	173	173	300	300	197	197	193	193	191	191	173	173	191	191	184	184	179	179	151	151
CHEN458-03	modern	171	171	153	153	175	175	192	192	204	204	168	168	215	215	168	168	209	209	207	207	163	163	197	197	204	204	130	130	173	173	300	300	197	197	193	193	191	191	173	173	191	191	184	184	179	179	151	151
CHEN458-04	modern	171	171	153	153	175	175	192	192	204	204	168	168	215	215	168	168	209	209	-1	-1	163	163	197	197	204	204	130	130	188	188	300	300	197	197	-1	-1	191	191	173	173	191	191	184	184	179	179	151	151
CHEN458-05	modern	171	171	153	153	175	175	192	192	204	204	168	168	215	215	168	168	209	209	207	207	163	163	197	197	204	204	130	130	188	188	300	300	197	197	193	193	191	191	173	173	191	191	184	184	179	179	151	151
CHEN458-06	modern	171	171	153	153	175	175	192	192	204	204	168	168	215	215	168	168	209	209	207	207	163	163	197	197	204	204	130	130	173	173	300	300	197	197	193	193	191	191	173	173	191	191	184	184	179	179	151	151
CHEN458-07	modern	171	171	153	153	175	175	192	192	204	204	168	168	215	215	168	168	209	209	207	207	163	163	197	197	204	204	130	130	173	173	300	300	197	197	193	193	191	191	173	173	191	191	184	184	179	179	151	151
CHEN458-08	modern	171	171	153	153	175	175	192	192	204	204	168	168	215	215	168	168	209	209	207	207	163	163	197	197	204	204	130	130	173	173	300	300	197	197	193	193	191	191	173	173	191	191	184	184	179	179	151	151
CHEN461-01	modern	171	171	162	162	175	175	192	192	168	168	172	172	215	215	168	168	209	209	207	207	144	144	200	200	207	207	136	136	180	180	300	300	197	197	193	193	191	191	173	173	191	191	176	176	181	181	139	139
CHEN461-02	modern	171	171	162	162	175	175	192	192	168	168	201	201	215	215	168	168	209	209	207	207	151	151	197	197	198	198	133	136	167	167	300	300	197	197	256	256	191	191	173	173	191	191	184	184	205	205	139	151
CHEN461-03	modern	171	171	162	162	175	175	189	192	204	204	172	172	215	215	168	168	202	202	207	207	144	144	197	197	192	192	136	136	170	180	300	300	197	197	199	256	191	203	173	173	191	191	176	176	181	203	139	139
CHEN461-04	modern	171	171	153	153	175	175	192	192	168	168	216	216	215	215	172	172	209	209	204	207	147	151	200	200	204	204	136	136	170	180	300	300	197	197	196	196	191	203	170	173	191	191	176	176	181	181	139	139
CHEN461-05	modern	171	171	153	153	175	175	189	189	168	168	225	225	215	215	168	168	202	202	-1	-1	147	147	197	200	198	198	133	133	180	180	300	300	197	197	-1	-1	203	203	173	173	191	191	176	176	181	181	153	153
CHEN461-06	modern	171	171	153	153	175	175	192	192	168	168	-1	-1	215	215	168	168	209	209	207	207	-1	-1	197	197	192	204	133	136	167	170	300	300	197	197	256	256	203	203	173	173	191	191	178	184	-1	-1	139	153
CHEN461-07	modern	171	171	153	162	175	175	192	192	168	168	216	225	215	215	168	168	202	209	207	207	144	144	197	200	192	198	133	136	170	180	300	300	197	197	193	193	191	191	170	173	191	191	176	176	181	181	139	153
CHEN461-08	modern	171	171	153	162	175	175	192	192	168	168	225	225	215	215	168	168	209	209	207	207	147	151	197	200	192	204	136	136	167	170	300	300	197	197	-1	-1	-1	-1	173	173	191	191	176	184	203	205	139	139
CHEN466-02	modern	169	169	158	158	171	171	168	168	204	204	177	177	200	200	165	165	203	203	157	157	157	157	200	200	180	180	127	127	191	191	312	312	200	200	-1	-1	185	185	167	167	185	185	176	176	179	179	153	153
CHEN466-03	modern	169	169	158	158	171	171	168	168	192	192	177	177	200	200	165	165	203	203	157	157	157	157	197	197	180	180	127	127	191	191	312	312	200	200	190	190	185	185	167	167	185	185	176	176	179	179	153	153
CHEN466-04	modern	169	169	158	158	171	171	168	168	204	204	177	177	200	200	165	165	203	203	157	157	157	157	200	200	180	180	127	127	191	191	312	312	200	200	190	190	185	185	167	167	185	185	176	176	179	179	153	153
CHEN466-05	modern	169	169	158	158	171	171	168	168	192	192	177	177	200	200	165	165	203	203	157	157	157	157	200	200	180	180	127	127	191	191	312	312	200	200	190	190	185	185	167	167	185	185	176	176	179	179	153	153
CHEN466-07	modern	169	169	158	158	171	171	168	168	204	204	177	177	200	200	150	165	203	203	157	157	157	157	200	200	180	180	127	127	191	191	312	312	218	218	-1	-1	185	185	167	167	185	185	176	176	183	183	153	153
CHEN466-08	modern	169	169	158	158	171	171	168	168	204	204	177	177	200	200	165	165	203	203	157	157	157	157	200	200	180	180	127	127	191	191	312	312	200	200	190	190	185	185	167	167	185	185	176	176	179	179	153	153
ANT-01	modern	164	164	162	162	169	169	171	171	201	204	183	192	212	212	159	159	198	198	172	172	169	169	194	194	180	180	136	136	194	194	297	297	218	218	190	193	191	191	167	167	189	189	174	174	183	183	151	151
ANT-02	modern	164	164	162	162	169	169	225	225	201	201	189	192	200	200	162	162	227	227	172	172	140	140	200	200	198	198	130	130	188	188	297	297	197	197	184	193	182	182	167	167	191	191	176	176	183	183	143	143
ANT-03	modern	164	164	162	162	169	169	171	171	201	201	183	192	212	215	159	159	198	198	172	172	169	169	194	200	180	180	136	136	194	194	297	297	218	218	190	193	191	191	167	167	189	189	174	174	183	183	151	151
ANT-04	modern	164	164	162	162	169	169	171	171	201	201	183	192	212	212	159	159	198	198	172	172	169	169	194	194	180	180	136	136	194	194	297	297	218	218	190	193	191	191	167	167	189	189	174	174	183	183	151	151
ANT-05	modern	164	164	162	162	169	169	171	171	201	201	183	192	212	212	159	159	198	198	-1	-1	169	169	194	194	180	180	136	136	194	194	297	297	218	218	190	193	191	191	167	167	189	189	174	174	183	183	151	151
ANT-06	modern	164	164	162	162	169	169	171	225	201	201	192	192	200	212	159	162	198	227	172	172	140	169	194	200	180	198	130	136	188	194	297	297	197	218	190	193	182	191	167	167	189	191	174	176	183	183	143	151
ANT-07	modern	164	164	153	162	169	169	168	171	201	201	180	180	200	200	159	162	186	198	157	172	154	157	197	200	180	198	136	142	182	188	297	312	197	200	-1	-1	191	197	167	179	191	191	174	176	185	187	143	151
ANT-08	modern	164	164	162	162	169	169	171	171	201	201	183	192	212	212	159	159	198	198	-1	-1	169	169	194	194	180	180	136	136	194	194	297	297	218	218	-1	-1	191	191	167	167	189	189	174	174	183	183	151	151
BL-01	modern	178	178	153	153	180	180	183	183	195	195	253	253	233	233	165	165	203	203	178	178	203	203	191	191	201	201	133	133	188	188	297	297	185	185	178	184	182	182	179	179	189	189	176	176	195	195	151	151
BL-02	modern	178	178	153	153	180	180	183	183	195	195	253	253	233	233	165	165	203	203	-1	-1	200	200	191	191	201	201	133	133	188	188	297	297	185	185	-1	-1	182	182	179	179	189	189	-1	-1	195	195	149	149
BL-03	modern	178	178	153	153	180	180	183	183	195	195	250	250	236	236	165	165	203	203	178	178	200	200	191	191	201	201	133	133	188	188	297	297	185	185	178	199	197	197	179	179	189	189	176	176	195	195	151	151
BL-04	modern	178	178	153	153	180	180	183	183	195	195	250	250	233	233	165	165	203	203	178	178	200	200	191	191	201	201	133	133	188	188	297	297	185	185	-1	-1	197	197	179	179	189	189	-1	-1	195	195	151	151
BL-05	modern	178	178	153	153	152	180	183	183	198	198	253	253	233	233	159	165	203	203	178	178	200	200	191	197	201	201	133	133	188	188	297	297	185	185	-1	-1	182	182	179	179	189	189	176	194	193	193	151	151
BL-07	modern	178	178	153	153	180	180	183	183	195	195	250	250	233	233	165	165	203	203	178	178	200	203	191	191	201	201	133	133	188	188	297	297	185	185	178	199	197	197	179	179	189	189	176	176	195	195	151	151
BL-08	modern	178	178	153	153	180	180	183	183	195	195	253	253	233	233	165	165	203	203	178	178	203	203	191	191	201	201	133	133	188	188	297	297	185	185	178	199	197	197	179	179	189	189	176	176	195	195	151	151
EST-01	modern	166	166	153	153	152	152	213	213	198	198	204	204	224	224	165	165	207	207	181	181	182	185	194	194	189	189	121	121	182	182	297	297	185	185	175	187	185	185	179	179	181	181	176	176	185	185	151	151
EST-02	modern	166	166	154	154	152	152	210	210	195	195	208	208	197	197	175	175	188	188	-1	-1	176	176	191	191	189	189	127	145	185	185	297	297	185	200	-1	-1	182	188	167	167	181	187	176	176	187	191	151	151
EST-03	modern	166	166	153	153	178	178	213	213	195	195	208	208	200	200	147	147	188	188	178	178	173	173	191	191	195	195	159	159	173	173	297	297	200	200	178	193	191	191	167	167	183	183	196	196	191	191	153	153
EST-04	modern	166	166	154	154	152	152	210	210	195	195	208	208	197	197	172	172	188	201	189	189	169	176	191	191	195	195	121	127	170	185	297	297	185	200	178	190	188	188	167	167	181	181	176	176	187	191	151	151
EST-05	modern	166	166	154	154	152	152	186	186	198	198	204	204	200	200	172	175	188	188	175	175	185	188	170	188	192	192	121	121	191	191	297	297	185	185	175	178	194	194	179	179	181	181	196	196	187	187	145	145
EST-06	modern	166	166	154	154	172	172	201	201	201	201	201	201	224	224	165	165	207	207	175	175	185	185	191	194	198	198	124	124	167	167	297	297	185	185	-1	-1	194	194	167	167	181	181	176	176	185	185	151	151
EST-07	modern	164	164	154	154	152	152	204	204	195	195	-1	-1	-1	-1	175	175	188	188	189	189	169	169	191	191	195	195	127	127	170	170	297	297	200	200	178	190	188	188	167	167	181	181	176	176	191	191	151	151
EST-08	modern	166	166	154	154	152	152	204	204	195	195	208	208	197	197	175	175	188	188	189	189	173	173	191	191	195	195	127	127	185	185	297	297	200	200	-1	-1	188	188	167	167	181	181	176	176	191	191	153	153
PPE-A-01	ancient	172	172	153	174	163	167	192	192	171	171	145	145	227	230	172	172	189	209	198	210	147	154	173	188	186	192	139	142	180	209	309	312	185	185	193	196	176	176	179	179	191	191	192	194	175	175	193	193
PPE-A-03	ancient	169	169	170	172	163	163	189	189	168	168	145	145	230	230	163	163	198	198	189	189	166	166	176	176	192	192	133	133	203	203	-1	-1	185	185	193	193	176	176	179	179	187	187	178	178	171	171	175	175
PPE-A-05	ancient	172	172	168	168	166	169	186	204	168	195	152	161	221	221	180	180	198	205	183	183	140	194	182	185	186	192	150	154	194	206	312	312	185	194	181	196	194	200	179	182	191	193	192	194	177	181	175	193
PPE-A-07	ancient	172	172	153	153	167	167	207	207	171	171	145	145	233	233	176	176	189	189	189	189	154	154	173	173	192	192	142	142	180	180	312	312	185	185	199	199	197	197	179	179	191	191	194	194	175	175	193	193
PPE-A-08	ancient	172	172	172	172	163	163	189	192	168	168	145	145	227	227	179	179	198	209	207	207	147	147	176	176	192	192	150	150	167	167	-1	-1	185	194	190	193	176	176	179	179	191	191	192	192	181	181	175	175
PPE-A-09	ancient	172	172	153	153	167	167	207	207	171	171	145	145	230	230	176	176	195	195	189	189	157	157	173	173	192	192	142	142	180	180	312	312	185	185	178	178	197	197	179	179	191	191	194	194	175	175	193	193
PPE-A-11	ancient	172	172	151	151	160	160	195	195	162	168	145	198	227	245	172	172	189	189	198	198	169	169	185	185	192	192	127	127	180	180	312	312	194	194	190	190	200	200	182	182	193	193	194	196	181	181	193	193
PPE-A-12	ancient	172	172	153	153	167	167	204	204	171	171	145	145	236	236	176	176	189	189	189	189	157	157	173	173	192	192	142	142	188	188	312	312	185	185	193	193	197	197	179	179	191	191	192	192	175	175	193	193
PPE-A-13	ancient	172	172	153	172	163	167	189	189	168	219	145	145	227	227	177	179	198	198	207	207	147	147	185	185	192	192	150	159	167	167	-1	-1	185	194	193	193	176	176	179	179	191	191	198	198	181	181	175	177
PPE-A-14	ancient	172	172	153	168	163	166	195	204	162	195	165	201	221	233	180	180	195	205	198	201	157	194	185	203	192	201	151	154	180	188	312	312	185	194	181	190	176	197	179	179	191	193	192	196	177	177	175	193
PPE-B-01	ancient	172	172	168	170	166	190	192	192	162	168	149	165	224	224	180	180	189	205	183	186	140	191	185	185	186	201	103	154	188	194	312	312	185	185	181	181	191	194	179	179	191	193	194	194	179	179	175	181
PPE-B-02	ancient	172	172	162	162	166	166	192	201	195	195	165	165	221	221	180	180	205	205	183	183	140	140	203	203	201	201	154	154	180	180	312	312	194	194	181	181	191	194	179	179	191	191	194	194	177	177	193	193
PPE-B-03	ancient	172	172	168	172	163	166	192	198	171	195	145	201	230	239	178	180	205	209	183	183	140	144	182	185	192	201	154	154	180	188	312	312	194	197	181	193	191	200	179	179	193	193	192	192	177	177	175	193
PPE-B-04	ancient	172	172	168	168	166	166	201	201	195	195	165	165	221	221	168	168	205	205	183	183	140	140	185	185	201	201	154	154	180	180	312	312	194	194	193	193	191	191	179	179	193	193	194	194	181	181	183	183
PPE-B-05	ancient	172	172	170	170	190	190	195	195	195	195	149	149	221	221	180	180	189	189	195	195	154	154	203	203	192	192	145	145	180	180	-1	-1	194	194	178	178	197	197	179	179	193	193	194	194	181	181	193	193
PPE-B-06	ancient	172	172	168	168	166	166	192	201	195	195	201	201	221	221	177	177	205	205	192	192	194	194	203	203	201	201	154	154	188	188	312	312	194	194	181	181	194	194	179	179	193	193	194	194	177	177	193	193
PPE-B-07	ancient	172	172	153	153	-1	-1	186	186	195	195	165	165	227	227	180	180	189	189	207	207	151	151	203	203	201	201	103	154	180	180	312	312	197	197	181	181	194	194	179	179	191	191	194	194	177	177	181	181
PPE-B-08	ancient	172	172	168	168	166	190	195	195	195	195	201	201	230	230	178	178	205	205	183	183	194	194	182	182	201	201	157	157	180	180	312	312	194	194	172	172	194	194	179	179	193	193	192	192	177	177	193	193
PPE-B-09	ancient	172	172	160	170	166	166	195	195	162	162	145	145	224	224	180	180	215	215	186	186	144	144	185	203	186	186	103	154	180	180	315	315	197	197	181	181	191	191	179	179	191	191	194	194	177	177	181	181
PPE-B-10	ancient	172	172	168	170	166	190	186	204	171	195	145	201	221	221	168	180	195	205	181	183	140	140	173	203	192	201	154	154	185	188	312	312	194	197	181	214	194	200	179	179	191	193	192	192	177	183	183	183
PPE-B-13	ancient	172	172	170	170	160	160	189	189	171	171	145	145	230	230	180	180	195	209	186	198	140	140	188	188	174	174	151	151	185	206	-1	-1	185	185	187	190	191	191	179	179	193	193	192	192	181	181	175	175
PPE-B-14	ancient	172	172	168	168	166	166	195	195	168	168	165	165	230	230	177	177	205	205	183	183	140	140	185	185	186	192	154	154	188	188	312	312	194	194	184	184	194	194	179	179	193	193	194	194	177	177	193	193
PPE-B-15	ancient	171	171	168	168	188	188	195	195	162	162	195	195	236	236	179	179	195	195	186	186	140	140	185	185	201	201	130	130	188	188	315	315	188	188	190	190	191	191	179	179	191	191	196	196	191	191	181	181
PPE-B-16	ancient	172	172	170	170	166	166	198	198	195	195	201	201	209	209	177	177	205	205	204	204	157	157	188	188	201	201	154	154	180	180	-1	-1	194	194	193	193	200	200	179	179	193	193	194	194	177	177	193	193
PPE-B-17	ancient	172	172	168	170	-1	-1	192	201	171	195	145	201	221	230	177	180	205	205	183	183	197	197	185	203	192	192	103	154	188	188	312	312	194	194	181	181	191	194	179	179	193	193	194	194	181	181	181	193
PPE-B-18	ancient	172	172	168	168	-1	-1	195	195	195	195	149	201	224	224	168	168	189	205	183	183	140	140	185	185	192	201	154	154	188	188	312	312	194	194	181	181	191	191	179	179	193	193	194	194	177	177	183	183
PPE-B-19	ancient	172	172	170	170	169	190	195	195	168	171	145	145	224	224	180	183	205	205	186	186	169	169	185	194	189	189	130	150	167	188	312	312	194	194	172	172	-1	-1	179	179	193	193	192	194	181	181	183	183
PPE-B-20	ancient	172	172	170	170	166	166	195	195	168	195	161	161	230	230	180	180	208	208	195	195	140	140	203	203	201	201	154	154	188	188	312	312	194	194	181	220	194	194	179	179	191	193	194	194	177	177	193	193
PPE-B-21	ancient	172	172	168	168	167	204	186	198	168	195	145	165	221	230	180	180	198	198	175	198	154	194	185	188	186	192	139	154	180	206	312	315	185	194	181	181	197	200	179	179	193	193	192	194	177	179	183	183
A-P4-A-02	ancient	172	172	153	153	166	166	-1	-1	171	180	145	149	209	230	180	180	205	205	195	195	154	154	-1	-1	186	186	-1	-1	-1	-1	-1	-1	-1	-1	-1	-1	-1	-1	179	179	191	193	192	194	-1	-1	-1	-1
A-P4-A-04	ancient	172	172	170	170	166	167	186	195	168	168	149	149	221	221	-1	-1	189	205	195	195	140	151	-1	-1	192	201	-1	-1	-1	-1	-1	-1	185	197	-1	-1	191	194	179	179	191	193	192	194	177	181	181	181
A-P4-A-06	ancient	172	172	153	170	166	166	131	195	168	192	152	165	221	230	-1	-1	205	205	183	198	140	154	185	185	186	201	-1	-1	194	209	-1	-1	185	200	-1	-1	176	191	179	179	193	193	196	196	175	177	-1	-1
A-P4-A-07	ancient	172	172	170	170	167	167	-1	-1	168	228	161	161	224	224	-1	-1	189	189	195	195	154	154	197	197	192	192	-1	-1	180	180	-1	-1	185	185	181	193	191	191	179	179	193	193	192	192	181	181	175	175
A-P4-A-11	ancient	172	172	168	170	190	190	192	192	195	195	145	145	224	224	-1	-1	205	205	183	183	157	157	185	185	201	201	-1	-1	180	188	-1	-1	188	188	-1	-1	-1	-1	179	179	-1	-1	178	178	-1	-1	-1	-1
A-P4-A-12	ancient	172	172	153	153	190	190	192	192	171	171	-1	-1	227	227	173	173	215	215	183	183	194	194	-1	-1	186	186	-1	-1	-1	-1	-1	-1	197	197	184	184	176	176	179	179	193	193	192	192	181	181	183	183
A-P4-A-15	ancient	172	172	168	168	163	166	186	192	168	168	201	201	224	224	162	179	205	205	183	183	154	154	-1	-1	192	192	-1	-1	-1	-1	-1	-1	185	185	190	196	194	194	179	179	193	193	194	194	179	191	181	181
A-P4-A-17	ancient	172	172	153	153	190	190	-1	-1	-1	-1	171	171	-1	-1	180	180	-1	-1	186	186	151	151	-1	-1	-1	-1	-1	-1	-1	-1	-1	-1	197	197	181	181	203	203	-1	-1	193	193	194	194	177	177	183	183
A-P4-A-20	ancient	172	172	162	162	163	163	-1	-1	-1	-1	158	158	230	230	180	180	205	205	192	192	194	194	-1	-1	201	201	-1	-1	-1	-1	-1	-1	194	194	193	193	191	191	179	179	193	193	194	194	191	191	181	181
A-P4-B-02	ancient	172	172	153	153	166	167	195	195	-1	-1	165	165	227	227	177	177	189	189	195	195	140	200	173	173	192	192	-1	-1	194	194	-1	-1	194	194	214	214	176	176	179	179	193	193	196	196	175	175	157	157
A-P9-A-01	ancient	171	171	153	153	182	182	192	192	162	162	216	216	218	218	163	163	207	207	183	183	273	273	203	203	189	189	-1	-1	176	176	297	297	176	176	178	178	188	188	179	179	187	187	176	176	177	177	191	191
A-P9-A-02	ancient	164	164	153	153	188	188	189	189	162	162	216	216	218	224	177	177	220	220	183	183	157	157	194	194	201	201	-1	-1	185	185	297	297	176	176	181	181	185	185	179	179	191	193	180	180	177	177	183	195
A-P9-A-03	ancient	164	171	153	153	182	182	192	192	162	228	155	208	218	218	168	168	220	220	175	186	137	242	200	200	186	186	-1	-1	-1	-1	297	297	185	185	172	187	182	185	179	179	-1	-1	176	178	177	177	183	187
A-P9-A-05	ancient	171	172	153	153	182	182	192	192	162	162	155	155	218	218	168	168	207	220	181	183	276	276	-1	-1	186	189	-1	-1	-1	-1	297	297	185	221	178	178	188	194	179	179	-1	-1	178	180	177	177	191	197
A-P9-A-06	ancient	171	172	153	153	182	203	131	192	171	171	155	198	212	218	163	163	207	220	169	172	242	267	200	200	186	195	-1	-1	194	194	297	297	185	215	172	181	185	185	179	179	-1	-1	176	180	177	185	191	195
A-P9-A-07	ancient	171	171	153	168	182	190	198	204	231	234	208	220	218	224	165	180	207	218	169	186	248	267	194	194	192	201	-1	-1	188	206	297	312	194	194	178	178	191	191	179	182	187	191	176	190	177	187	187	195
A-P9-A-09	ancient	-1	-1	153	153	182	182	192	192	-1	-1	155	155	218	218	163	168	203	207	172	172	137	137	194	206	198	204	-1	-1	-1	-1	297	297	-1	-1	178	178	185	185	-1	-1	-1	-1	176	180	177	177	183	191
A-P9-A-10	ancient	166	191	153	153	163	163	-1	-1	-1	-1	208	208	224	224	-1	-1	220	220	183	183	154	154	-1	-1	201	201	-1	-1	194	194	294	294	185	185	178	178	185	185	179	179	-1	-1	190	190	199	199	183	183
A-P9-A-11	ancient	171	187	170	170	190	190	189	189	225	225	213	213	227	227	180	180	212	212	183	183	157	157	194	194	198	198	-1	-1	206	206	312	312	176	176	181	181	188	188	179	179	-1	-1	180	180	199	199	195	195
A-P9-A-13	ancient	164	191	153	153	182	182	189	189	210	210	216	216	221	236	162	162	220	220	186	186	273	273	194	194	201	201	-1	-1	170	170	297	297	185	194	178	178	185	185	179	179	-1	-1	198	198	187	187	195	195
A-P9-A-14	ancient	171	171	153	153	190	190	189	198	231	231	216	216	224	224	162	162	217	220	183	183	309	309	200	200	201	201	-1	-1	173	206	297	312	194	194	190	190	188	200	179	179	-1	-1	176	176	187	187	193	193
A-P9-A-15	ancient	166	171	153	153	182	190	134	189	210	222	204	210	221	224	162	180	212	220	183	183	154	285	194	194	198	201	-1	-1	170	194	294	312	176	185	181	199	185	185	167	179	191	191	176	180	199	199	183	183
A-P9-A-16	ancient	171	171	153	153	182	182	192	192	168	225	155	210	218	224	165	177	207	212	175	183	137	137	200	203	186	198	-1	-1	167	194	297	312	176	185	178	178	185	188	179	179	187	189	176	178	177	199	187	195
A-P9-A-17	ancient	171	171	153	153	190	190	131	198	213	213	216	216	224	224	180	180	207	212	183	183	254	303	194	194	198	201	-1	-1	161	188	297	297	176	185	181	181	185	185	179	182	187	191	176	180	199	199	157	195
A-P9-A-18	ancient	-1	-1	153	153	182	186	131	189	210	210	210	213	224	233	162	162	220	220	183	183	154	154	-1	-1	201	201	-1	-1	170	203	294	297	185	188	199	199	185	185	167	179	-1	-1	176	176	177	207	183	193
A-P9-A-20	ancient	-1	-1	153	153	182	190	189	192	168	168	210	216	224	224	163	180	207	212	183	183	137	157	194	203	198	204	-1	-1	170	206	312	312	176	176	181	181	188	194	179	179	-1	-1	176	180	197	199	195	195
A-P9-A-21	ancient	164	187	153	153	182	182	192	192	162	165	155	155	218	218	168	168	203	220	175	175	273	273	194	203	198	198	-1	-1	-1	-1	297	297	221	221	181	181	185	185	167	167	-1	-1	180	180	209	209	191	197
A-P9-A-22	ancient	172	191	153	153	182	190	189	189	228	228	198	198	224	224	165	165	220	220	183	183	267	267	197	197	201	201	-1	-1	203	203	312	312	194	194	178	178	185	185	167	167	-1	-1	180	180	199	199	187	187
A-P9-A-23	ancient	171	171	153	153	182	182	189	189	210	210	213	213	224	224	159	180	220	220	183	183	273	273	203	203	201	201	-1	-1	176	176	297	297	185	185	181	193	185	185	182	182	-1	-1	176	176	201	201	183	183
A-P9-A-24	ancient	171	171	153	153	180	188	131	198	210	228	208	208	218	224	162	165	203	215	183	192	154	254	194	197	198	201	-1	-1	180	194	297	309	176	215	172	178	188	194	173	179	191	193	180	180	177	183	157	157
A-P9-A-25	ancient	164	171	153	153	176	190	131	189	210	210	216	216	212	212	168	168	203	207	178	183	154	294	194	194	201	201	-1	-1	188	188	294	325	176	176	178	178	200	200	167	167	-1	-1	176	176	187	187	195	195
A-P9-A-26	ancient	-1	-1	153	153	182	182	131	192	204	204	213	213	218	224	168	168	207	212	172	172	137	137	200	200	198	198	-1	-1	167	167	297	297	185	221	175	175	185	185	167	179	-1	-1	178	180	177	181	187	191
A-P9-A-28	ancient	172	187	153	153	182	182	189	189	-1	-1	220	220	218	218	168	168	207	223	183	183	137	137	203	203	186	186	-1	-1	-1	-1	312	312	-1	-1	172	172	191	191	167	182	-1	-1	180	180	207	207	191	191
A-P9-A-29	ancient	166	191	153	153	182	182	-1	-1	171	171	198	201	224	224	159	162	207	207	183	183	294	294	194	194	204	204	-1	-1	194	194	297	312	194	194	178	178	194	197	179	179	-1	-1	176	176	187	197	153	153
A-P9-A-30	ancient	-1	-1	153	153	182	182	134	198	210	234	210	216	224	224	162	180	220	220	189	189	273	273	194	197	189	189	-1	-1	203	206	294	297	215	215	199	199	185	197	167	179	-1	-1	190	198	177	187	153	153
A-P9-B-01	ancient	-1	-1	172	172	176	204	131	210	168	174	138	171	227	230	172	172	203	225	183	192	169	169	173	176	198	198	-1	-1	167	167	312	315	200	200	199	199	191	191	170	179	-1	-1	180	180	197	209	125	187
A-P9-B-02	ancient	171	171	172	172	190	190	-1	-1	162	162	208	208	227	227	173	173	207	207	181	181	130	160	160	160	201	201	-1	-1	-1	-1	-1	-1	-1	-1	178	178	194	194	-1	-1	-1	-1	178	178	169	169	167	167
A-P9-B-03	ancient	171	171	153	153	163	190	134	189	-1	-1	208	208	215	221	162	180	220	220	172	186	176	179	182	194	198	201	-1	-1	167	191	294	315	185	185	178	199	179	185	179	179	189	191	176	180	169	199	185	189
A-P9-B-04	ancient	171	171	153	174	176	182	131	131	171	174	152	213	227	239	162	172	203	203	169	189	173	254	185	203	198	201	-1	-1	161	191	297	315	215	224	178	199	185	188	179	179	-1	-1	180	180	177	197	187	195
A-P9-B-05	ancient	171	171	153	153	176	182	189	189	162	174	208	208	227	227	172	172	203	203	175	175	173	173	185	185	189	198	-1	-1	176	176	297	297	224	224	205	205	188	188	179	182	193	193	176	178	187	209	145	145
A-P9-B-08	ancient	159	171	172	172	163	204	131	183	162	237	165	208	215	227	180	184	225	225	181	181	169	273	-1	-1	198	201	-1	-1	176	176	297	315	185	224	178	199	188	197	179	179	187	193	176	180	177	193	125	145
A-P9-B-10	ancient	171	171	160	172	176	192	131	131	174	174	158	171	230	230	162	184	207	225	178	178	130	130	160	160	201	201	-1	-1	167	167	-1	-1	227	227	199	205	197	197	170	179	191	191	180	180	193	193	187	187
A-P9-B-11	ancient	171	171	172	172	176	176	-1	-1	174	174	168	168	227	227	-1	-1	198	198	181	181	173	173	182	182	198	198	-1	-1	167	167	-1	-1	224	224	199	199	197	197	179	179	189	189	180	180	193	193	197	197
T-C2-1-11	ancient	157	157	168	168	174	174	213	213	195	195	177	177	239	239	218	218	196	196	-1	-1	-1	-1	215	215	209	209	99	99	173	173	-1	-1	212	212	190	190	209	209	170	170	173	173	188	188	173	173	147	147
T-C2-2-08	ancient	172	172	153	153	167	167	-1	-1	168	177	145	145	206	206	177	177	198	198	195	195	151	151	188	188	192	192	-1	-1	212	212	-1	-1	185	185	190	190	206	206	179	179	191	191	194	194	181	181	183	183
A-CS-03	ancient	171	171	153	153	163	190	-1	-1	201	204	155	155	215	215	180	180	215	215	181	181	154	163	-1	-1	201	201	-1	-1	-1	-1	-1	-1	185	185	202	202	194	197	-1	-1	189	191	190	190	177	177	153	179
A-CS-04	ancient	164	166	153	153	188	190	-1	-1	-1	-1	208	210	215	218	-1	-1	207	220	186	186	267	267	-1	-1	201	201	-1	-1	203	206	312	312	185	194	178	187	194	194	179	182	187	187	176	176	177	177	187	193
